# Supplementary material for: Occurrence of Escherichia Coli O157:H7 in lactating cows and dairy farm environment and the antimicrobial susceptibility pattern at Adami Tulu Jido Kombolcha District, Ethiopia
Source: PubMed Central journal article supplement (PMC9832739; doi:10.1186/s12917-023-03565-9), 2023-01-11
Supplement: 12917_2023_3565_MOESM2_ESM.pdf [file 12917_2023_3565_MOESM2_ESM.pdf]

## Questionnaire format

### Format 1: Questionnaire format for farm owner

Farm ID or No: \_\_\_\_\_ Date \_\_\_\_\_

1. Farm name \_\_\_\_\_ Address \_\_\_\_\_
2. Scale and type of dairy farm: \_\_\_\_\_ Government \_\_\_\_\_ Private \_\_\_\_\_
3. Herd size \_\_\_\_\_ Breed: local \_\_\_\_\_ cross \_\_\_\_\_ exotic \_\_\_\_\_
5. Feed and water hygiene and storage: Excellent  very good  Good  Fair   
Poor
6. If your animals are enclosed, what type of animal house floor is in? (Only single choice)  
Covered with manure  Concrete  Earthed floor  Others  
(specify) \_\_\_\_\_
7. How often the barn and/or the milking room are/is cleaned?  
Twice a day  Once a day  Once per two days  Others (sepecify) \_\_\_\_\_
8. Where do cows milked? In barn  In milking room  Any where
9. How do you milk your cows? By hand milking  By milking machine
10. Milking frequency per day: Once  Twice  Three times  If more  
label \_\_\_\_\_
11. When do you wash your hands? (Encircle)
  - a. Before and after milking
  - b. Between milking
  - c. Only before milking
  - d. Only after milking
  - e. Not at all
12. When do you use teat bathe and towel? (Encircle)
  - a. Before milking
  - b. After milking
  - c. Between milking
  - d. before and after milking
  - e. Don't use any dip and towel
13. Do you sell raw milk to customers? Every day  Sometimes  Never
- 13.1. When you sell? Every morning  Afternoon  Evening
- 13.2. Have you transportation facility to deliver milk for your customer?
- 13.3. Where does the milk go? To household consumption \_\_\_\_\_ To restaurants \_\_\_\_\_ To \_\_\_\_\_
14. How do you keep milk containers and milking buckets? Washing with:

- a. Warm water
- b. Cold water
- c. Both warm and cold water
- d. Detergents

15. Milker's clothing: Boot \_\_\_\_\_ Clean outer garment \_\_\_\_\_ Ordinary own cloth \_\_\_\_\_ Apron \_\_\_\_\_ others (specify) \_\_\_\_\_ Interviewer observation \_\_\_\_\_

16. Do you sell raw milk to customers? Every day  Sometimes  Never

16.1. When you sell? Every morning  Afternoon  Evening

16.2. Have you transportation facility to deliver milk for your customer? Yes  No

16.3. Where does the milk go?

17. Do lactating herd experience mastitis at the farm? Yes \_\_\_\_\_

No \_\_\_\_\_

17.1. If your answer is yes, who treated mastitis cow? \_\_\_\_\_

18. Is there any practice of record keeping? Yes \_\_\_\_\_

No \_\_\_\_\_

If yes: Breeding records \_\_\_\_\_ Calving records \_\_\_\_\_ Production records \_\_\_\_\_ Health records \_\_\_\_\_ Financial records \_\_\_\_\_ Feeding records \_\_\_\_\_

Others \_\_\_\_\_
